# Supplementary material
Source: Springer Nature journal article supplement (https://www.springermedizin.de/resource/supplementary/13058_2011_2895_MOESM6_ESM.pdf/9702802)

**A**

PyMT+ Transgenic

WT

KO

K14

K8

DAPI

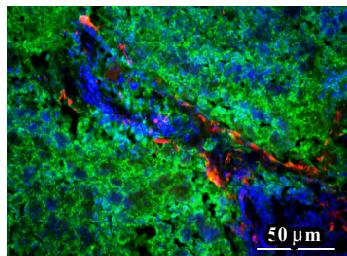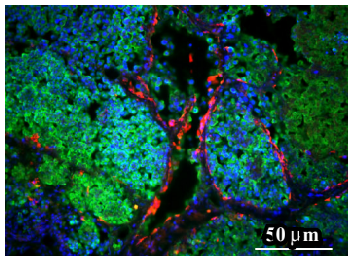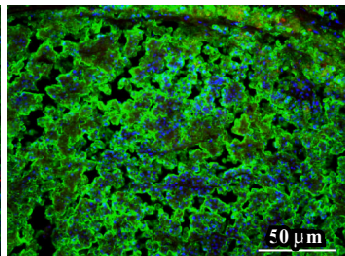

K5

DAPI

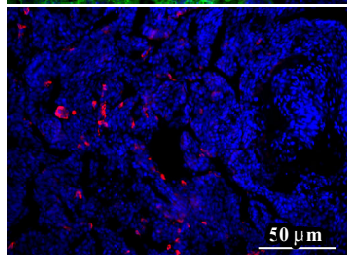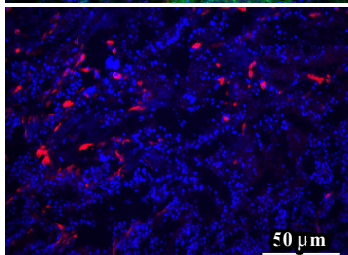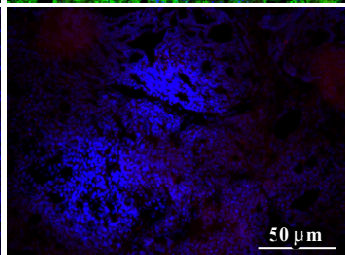**B**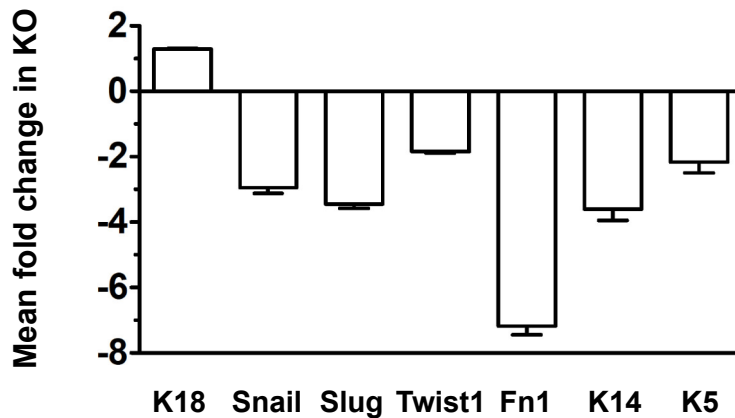

Supplement: MOESM6 [file 9702802]
